# Supplementary material for: Incorporating a brief intervention for personalised cancer risk assessment to promote behaviour change into primary care: a multi-methods pilot study
Source: Springer Nature journal article supplement (doi:10.1186/s12889-021-10210-3), 2021-01-23
Supplement: MOESM1 [file 18794260]

## Additional File 1. GP practice characteristics

| NHS Health Checks       |                         |                                                                 |                                 |                                                |
|-------------------------|-------------------------|-----------------------------------------------------------------|---------------------------------|------------------------------------------------|
| GP practice             | Registered patients (n) | Deprivation index decile<br>(1 most deprived-10 least deprived) | HCP delivering intervention (n) | Methods of invitation                          |
| A                       | 10438                   | 9                                                               | 1                               | Letter                                         |
| B                       | 12567                   | 6                                                               | 2                               | Letter, follow-up telephone call               |
| C                       | 7893                    | 10                                                              | 2                               | Letter                                         |
| D                       | 12057                   | 9                                                               | 2                               | Letter, follow-up telephone call               |
| <b>Total</b>            | <b>42955</b>            |                                                                 | <b>7</b>                        |                                                |
| Chronic disease reviews |                         |                                                                 |                                 |                                                |
| GP practice             | Registered patients (n) | Deprivation index decile<br>(1 most deprived-10 least deprived) | HCP delivering intervention (n) | Methods of invitation                          |
| D (Diabetes)            | 12057                   | 9                                                               | 2                               | Letter                                         |
| E (Diabetes)            | 8407                    | 9                                                               | 2                               | Letter, follow-up telephone call, text message |
| E (Asthma)              |                         |                                                                 |                                 |                                                |
| <b>Total</b>            | <b>20464</b>            |                                                                 | <b>4</b>                        |                                                |
