# Supplementary material for: Incorporating a brief intervention for personalised cancer risk assessment to promote behaviour change into primary care: a multi-methods pilot study
Source: Springer Nature journal article supplement (doi:10.1186/s12889-021-10210-3), 2021-01-23
Supplement: MOESM8 [file 18794260]

**Additional File 8. Psychological outcomes and risk factor awareness within the groups receiving the intervention**

|                                     |          | <b>Baseline<br/>(n=50)</b> |          | <b>Immediate follow-up<br/>(n=35)</b>     |          | <b>3 month<br/>(n=30)</b>                 |
|-------------------------------------|----------|----------------------------|----------|-------------------------------------------|----------|-------------------------------------------|
|                                     | <i>N</i> | <b>Mean (SD)</b>           | <b>n</b> | <b>Change from baseline<br/>Mean (SD)</b> | <b>n</b> | <b>Change from baseline<br/>Mean (SD)</b> |
| <b>Risk Perception</b>              |          |                            |          |                                           |          |                                           |
| Perceived AR                        | 45       | 29.3 (22.8)                | 31       | -4.1 (-14.0 to 5.8)                       | 22       | -0.52 (-8.45 to 7.41)                     |
| Conviction of Perceived AR          | 48       | 3.58 (1.7)                 | 32       | 0.33 (-0.45 to 1.1)                       | 26       | 0.33 (-0.31 to 0.96)                      |
| Perceived RR                        | 50       | 3.48 (1.2)                 | 35       | 0.2 (-0.24 to 0.64)                       | 29       | 0.03 (-0.51 to 0.58)                      |
| Conviction of Perceived RR          | 47       | 3.86 (1.6)                 | 33       | 0.20 (-0.41 to 0.82)                      | 24       | 0.38 (-0.25 to 1.00)                      |
| <b>Risk Perception</b>              |          |                            |          |                                           |          |                                           |
| Perceived AR                        | 45       | 29.3 (22.8)                | 31       | -4.1 (-14.0 to 5.8)                       | 22       | -0.52 (-8.45 to 7.41)                     |
| Conviction of Perceived AR          | 48       | 3.58 (1.7)                 | 32       | 0.33 (-0.45 to 1.1)                       | 26       | 0.33 (-0.31 to 0.96)                      |
| Perceived RR                        | 50       | 3.48 (1.2)                 | 35       | 0.2 (-0.24 to 0.64)                       | 29       | 0.03 (-0.51 to 0.58)                      |
| Conviction of Perceived RR          | 47       | 3.86 (1.6)                 | 33       | 0.20 (-0.41 to 0.82)                      | 24       | 0.38 (-0.25 to 1.00)                      |
| <b>Maladaptive Coping Behaviour</b> | 48       | 9.3 (2.0)                  | 35       | 0.35 (-0.47 to 1.18)                      | 29       | 0.45 (-0.39 to 1.28)                      |
| <b>Cancer Worry</b>                 | 46       | 4.8 (2.0)                  | ---      | ---                                       | 25       | 0.12 (-0.40 to 0.64)                      |
| <b>Anxiety</b>                      | 45       | 12.1 (2.2)                 | 34       | 0.75 (-0.14 to 1.64)                      | 25       | 0.64 (-0.22 to 1.50)                      |
|                                     |          | <b>% (95% CI)</b>          |          | <b>% (95% CI)</b>                         |          | <b>% (95% CI)</b>                         |
| <b>Absolute risk accuracy</b>       | 45       |                            | 31       |                                           | 24       |                                           |
| Accurate ( $\pm 5\%$ )              |          | 17.8 (8.9 to 32.4)         |          | 25.8 (12.9 to 44.9)                       |          | 25.0 (11.0 to 47.4)                       |
| Underestimate                       |          | 4.4 (1.1 to 16.9)          |          | 0 (0)                                     |          | 0 (0)                                     |
| Overestimate                        |          | 77.8 (62.8 to 87.9)        |          | 74.2 (55.1 to 87.1)                       |          | 75.0 (52.6 to 89.0)                       |
| <b>Comparative risk accuracy</b>    | 50       |                            | 35       |                                           | 29       |                                           |
| Accurate                            |          | 36.0 (23.6 to 50.6)        |          | 25.7 (13.5 to 43.4)                       |          | 41.4 (24.3 to 60.8)                       |
| Underestimate                       |          | 48.0 (34.2 to 62.1)        |          | 51.4 (34.5 to 68.0)                       |          | 44.9 (27.2 to 63.9)                       |
| Overestimate                        |          | 16.0 (8.0 to 29.4)         |          | 22.9 (11.4 to 40.5)                       |          | 13.8 (4.9 to 33.0)                        |
